# Supplementary material for: Mechanistic insight in the selective delignification of wheat straw by three white-rot fungal species through quantitative 13C-IS py-GC–MS and whole cell wall HSQC NMR
Source: PubMed Central journal article supplement (PMC6156916; doi:10.1186/s13068-018-1259-9), 2018-09-26
Supplement: 13068_2018_1259_MOESM1_ESM.pdf [file 13068_2018_1259_MOESM1_ESM.pdf]

## Formulae for calculation of lignin content and relative abundance by <sup>13</sup>C-IS py-GC-MS

$$RRF_{run,i} = RRF_{start,i} \cdot \frac{A_{i,start}^{WSref}}{A_{i,run}^{WSref}} \cdot \frac{\sum_{i=1}^{43} \frac{A_{i,start}^{WSref}}{RRF_{start,i}}}{\sum_{i=1}^{43} \frac{A_{i,run}^{WSref}}{RRF_{start,i}}} \quad (1)$$

where i refers to compound number (Table S-1) (only initially monitored products included (1)), A is peak area of reference wheat straw at system performance relative response factors (RRF) were determined ('start') and in each run performed ('run'). M<sub>w</sub> is the molecular weight. Run refers to one sequence of measurements.

$$Lignin\ content\ (w/w)\% = \frac{\sum_{i=1}^{49} \frac{A_i^{12C} \cdot M_{w12C}}{RRF_{run,i}} \cdot m_{IS}}{\sum_{i=1}^{49} \frac{A_i^{13C} \cdot M_{w13C}}{RRF_{run,i}} \cdot m_{sample}} \cdot 100 \quad (2)$$

where i refers to compound number (Table S-1), A is area, RRF<sub>run</sub> is corrected relative response factor, m<sub>IS</sub> is the amount of IS (corrected for purity) (μg; <sup>13</sup>C-LIGpure), m<sub>sample</sub> is the amount of sample (μg).

$$Relative\ abundance\ (RA)\ (\%) = \frac{\frac{A_i}{RRF_{run,i}}}{\sum_{i=1}^{49} \frac{A_i}{RRF_{run,i}}} \cdot 100 \quad (3)$$

where i refers to compound number (Table S-1), A is area, RRF<sub>run</sub> is corrected relative response factor.

$$Relative\ abundance\ factor\ (RAF)_i^{13C} = \frac{RA_i^{13C\ IS}}{RA_{i,WSref}^{13C\ IS}} \quad (4)$$

where i refers to compound number (Table S-1), RA is relative abundance.

$$Relative\ abundance_{i,corrected} = \frac{RA_i}{RAF_i^{13C}} \cdot \left( \frac{100}{\sum_{i=1}^{49} \frac{RA_i}{RAF_i^{13C}}} \right) \quad (5)$$

where i refers to compound number (Table S-1), RA is relative abundance, RAF is relative abundance factor (eq 4)

### References

1. van Erven G, de Visser R, Merckx DW, Strolenberg W, De Gijssel P, Gruppen H, et al. Quantification of Lignin and Its Structural Features in Plant Biomass Using <sup>13</sup>C Lignin as Internal Standard for Pyrolysis-GC-SIM-MS. Anal Chem. 2017;89:10907-16.
