# Supplementary material for: Mechanistic insight in the selective delignification of wheat straw by three white-rot fungal species through quantitative 13C-IS py-GC–MS and whole cell wall HSQC NMR
Source: PubMed Central journal article supplement (PMC6156916; doi:10.1186/s13068-018-1259-9), 2018-09-26
Supplement: 13068_2018_1259_MOESM2_ESM.pdf [file 13068_2018_1259_MOESM2_ESM.pdf]

**Table S-1 Identity, structural classification and relative abundance of lignin-derived pyrolysis products by <sup>13</sup>C-IS py-GC-MS.** Control and fungal-treated wheat straw samples after 7 weeks of treatment. *Cs Ceriporiopsis subvermispora*, *Pe Pleurotus eryngii*, *Le Lentinula edodes*. Average of analytical triplicates on pooled biological triplicates.

| #  | Compound                 | CAS      | Retention time (min) | Structural feature                      | Sidechain length | M <sub>w</sub> <sup>12</sup> C (g·mol <sup>-1</sup> ) | Control | Cs1  | Cs12 | Pe3  | Pe6  | Le8  | Le10 |
|----|--------------------------|----------|----------------------|-----------------------------------------|------------------|-------------------------------------------------------|---------|------|------|------|------|------|------|
| 1  | phenol                   | 108952   | 10.03                | H, unsub.                               | 0                | 94                                                    | 0.7     | 2.0  | 1.9  | 1.1  | 0.9  | 1.5  | 1.6  |
| 2  | guaiacol                 | 90051    | 10.31                | G, unsub.                               | 0                | 124                                                   | 2.1     | 4.2  | 4.0  | 2.7  | 2.5  | 3.2  | 3.4  |
| 3  | 2-methylphenol           | 95487    | 11.29                | H, methyl                               | C <sub>α</sub>   | 108                                                   | 0.2     | 0.4  | 0.4  | 0.2  | 0.2  | 0.3  | 0.3  |
| 4  | 4-methylphenol (+3-MP)   | 106445   | 12.23                | H, methyl                               | C <sub>α</sub>   | 108                                                   | 0.5     | 1.1  | 1.2  | 0.8  | 0.7  | 0.9  | 1.0  |
| 5  | 4-methylguaiacol         | 93516    | 13.01                | G, methyl                               | C <sub>α</sub>   | 138                                                   | 0.7     | 1.0  | 1.0  | 0.9  | 0.9  | 0.9  | 0.9  |
| 6  | 2,4-dimethylphenol       | 105679   | 13.46                | H, methyl                               | C <sub>α</sub>   | 122                                                   | 0.1     | 0.2  | 0.2  | 0.1  | 0.1  | 0.1  | 0.2  |
| 7  | 4-ethylphenol            | 123079   | 14.52                | H, misc.                                | C <sub>β</sub>   | 122                                                   | 0.1     | 0.1  | 0.1  | 0.1  | 0.1  | 0.1  | 0.1  |
| 8  | 4-ethylguaiacol          | 2785899  | 15.19                | G, misc.                                | C <sub>β</sub>   | 152                                                   | 0.1     | 0.2  | 0.2  | 0.2  | 0.2  | 0.2  | 0.2  |
| 9  | 4-vinylguaiacol          | 7786610  | 16.64                | G, vinyl                                | C <sub>β</sub>   | 150                                                   | 20.3    | 20.4 | 20.3 | 19.9 | 21.4 | 21.7 | 21.0 |
| 10 | 4-vinylphenol            | 2628173  | 16.77                | H, vinyl                                | C <sub>β</sub>   | 120                                                   | 7.8     | 7.7  | 7.8  | 7.3  | 7.8  | 7.8  | 7.9  |
| 11 | eugenol                  | 97530    | 17.26                | G, misc.                                | C <sub>γ</sub>   | 164                                                   | 0.2     | 0.2  | 0.2  | 0.2  | 0.2  | 0.2  | 0.2  |
| 12 | 4-propylguaiacol         | 2785877  | 17.34                | G, misc.                                | C <sub>γ</sub>   | 166                                                   | 0.1     | 0.2  | 0.2  | 0.2  | 0.2  | 0.2  | 0.2  |
| 13 | syringol                 | 91101    | 18.00                | S, unsub.                               | 0                | 154                                                   | 1.9     | 3.2  | 3.5  | 2.3  | 2.3  | 2.4  | 2.7  |
| 14 | cis-isoeugenol           | 97541    | 18.63                | G, misc.                                | C <sub>γ</sub>   | 164                                                   | 0.1     | 0.1  | 0.1  | 0.1  | 0.1  | 0.1  | 0.1  |
| 15 | 4-propenylphenol         | 539128   | 19.54                | H, misc.                                | C <sub>γ</sub>   | 134                                                   | 0.1     | 0.1  | 0.1  | 0.1  | 0.1  | 0.1  | 0.1  |
| 16 | trans-isoeugenol         | 97541    | 19.90                | G, misc.                                | C <sub>γ</sub>   | 164                                                   | 0.8     | 1.0  | 0.9  | 1.1  | 1.1  | 1.1  | 1.1  |
| 17 | 4-methylsyringol         | 6638057  | 20.26                | S, methyl                               | C <sub>α</sub>   | 168                                                   | 0.5     | 0.6  | 0.6  | 0.6  | 0.6  | 0.6  | 0.6  |
| 18 | vanillin                 | 121335   | 20.35                | G, C <sub>α</sub> -O                    | C <sub>α</sub>   | 152                                                   | 1.2     | 2.1  | 2.3  | 1.4  | 1.2  | 1.4  | 1.4  |
| 19 | 4-propynguaiacol         | -        | 20.64                | G, misc.                                | C <sub>γ</sub>   | 162                                                   | 0.1     | 0.1  | 0.1  | 0.1  | 0.1  | 0.1  | 0.1  |
| 20 | 4-alleneguaiacol         | -        | 20.90                | G, misc.                                | C <sub>γ</sub>   | 162                                                   | 0.1     | 0.1  | 0.1  | 0.1  | 0.1  | 0.1  | 0.1  |
| 21 | homovanillin             | 5603242  | 21.81                | G, C <sub>β</sub> -O                    | C <sub>β</sub>   | 166                                                   | 0.5     | 0.7  | 0.8  | 0.5  | 0.5  | 0.5  | 0.5  |
| 22 | 4-ethylsyringol          | 14059928 | 22.00                | S, misc.                                | C <sub>β</sub>   | 182                                                   | 0.0     | 0.0  | 0.1  | 0.1  | 0.0  | 0.0  | 0.0  |
| 23 | acetovanillone           | 498022   | 22.27                | G, C <sub>α</sub> -O                    | C <sub>β</sub>   | 166                                                   | 0.3     | 1.1  | 1.2  | 0.6  | 0.5  | 0.6  | 0.7  |
| 24 | 4-hydroxybenzaldehyde    | 123080   | 23.01                | H, C <sub>α</sub> -O                    | C <sub>α</sub>   | 122                                                   | 0.2     | 0.3  | 0.3  | 0.2  | 0.1  | 0.2  | 0.2  |
| 25 | 4-vinylsyringol          | 28343228 | 23.32                | S, vinyl                                | C <sub>β</sub>   | 180                                                   | 2.4     | 2.0  | 2.2  | 2.3  | 2.4  | 2.3  | 2.3  |
| 26 | guaiacylacetone          | 2503460  | 23.50                | G, C <sub>β</sub> -O                    | C <sub>γ</sub>   | 180                                                   | 0.3     | 0.7  | 0.7  | 0.4  | 0.3  | 0.4  | 0.4  |
| 27 | 4-allylsyringol          | 6627889  | 23.75                | S, misc.                                | C <sub>γ</sub>   | 194                                                   | 0.2     | 0.2  | 0.2  | 0.2  | 0.2  | 0.2  | 0.2  |
| 28 | propiovanillone          | 1835149  | 24.18                | S, C <sub>α</sub> -O                    | C <sub>γ</sub>   | 180                                                   | 0.0     | 0.1  | 0.1  | 0.0  | 0.0  | 0.1  | 0.1  |
| 29 | guaiacyl vinyl ketone    | -        | 24.47                | G, C <sub>α</sub> -O                    | C <sub>β</sub>   | 178                                                   | 0.1     | 0.2  | 0.2  | 0.1  | 0.1  | 0.1  | 0.1  |
| 30 | vanilloyl acetaldehyde   | -        | 24.69                | G, C <sub>α</sub> -O, C <sub>γ</sub> -O | C <sub>γ</sub>   | 194                                                   | 0.2     | 4.3  | 3.9  | 0.9  | 0.6  | 1.5  | 1.5  |
| 31 | cis-4-propenylsyringol   | 26624135 | 24.88                | S, misc.                                | C <sub>γ</sub>   | 194                                                   | 0.1     | 0.1  | 0.1  | 0.1  | 0.1  | 0.1  | 0.1  |
| 32 | 4-propynesyringol        | -        | 25.52                | S, misc.                                | C <sub>γ</sub>   | 192                                                   | 0.1     | 0.1  | 0.1  | 0.1  | 0.2  | 0.1  | 0.1  |
| 33 | 4-allenesyringol         | -        | 25.73                | S, misc.                                | C <sub>γ</sub>   | 192                                                   | 0.1     | 0.1  | 0.1  | 0.1  | 0.1  | 0.1  | 0.1  |
| 34 | trans-4-propenylsyringol | 26624135 | 26.19                | S, misc.                                | C <sub>γ</sub>   | 194                                                   | 0.9     | 0.8  | 0.9  | 1.0  | 0.6  | 0.9  | 0.9  |
| 35 | dihydroconiferyl alcohol | 2305137  | 26.22                | S, C <sub>γ</sub> -O                    | C <sub>γ</sub>   | 182                                                   | 0.1     | 0.1  | 0.1  | 0.1  | 0.1  | 0.1  | 0.1  |
| 36 | syringaldehyde           | 134963   | 26.75                | S, C <sub>α</sub> -O                    | C <sub>α</sub>   | 182                                                   | 0.7     | 0.8  | 1.0  | 0.7  | 0.7  | 0.6  | 0.7  |
| 37 | cis-coniferyl-alcohol    | 458355   | 26.82                | G, C <sub>γ</sub> -O                    | C <sub>γ</sub>   | 180                                                   | 1.3     | 1.1  | 1.0  | 1.4  | 1.3  | 1.3  | 1.3  |
| 38 | homosyringaldehyde       | -        | 27.75                | S, C <sub>β</sub> -O                    | C <sub>γ</sub>   | 196                                                   | 0.3     | 0.4  | 0.5  | 0.3  | 0.3  | 0.3  | 0.3  |
| 39 | acetosyringone           | 2478388  | 28.20                | S, C <sub>α</sub> -O                    | C <sub>β</sub>   | 196                                                   | 0.6     | 1.2  | 1.4  | 0.9  | 0.8  | 0.8  | 0.8  |
| 40 | trans-coniferyl alcohol  | 458355   | 28.55                | G, C <sub>γ</sub> -O                    | C <sub>γ</sub>   | 180                                                   | 31.6    | 22.4 | 20.0 | 30.0 | 29.8 | 28.3 | 27.7 |
| 41 | trans-coniferaldehyde    | 458366   | 28.92                | G, C <sub>γ</sub> -O                    | C <sub>γ</sub>   | 178                                                   | 1.8     | 2.0  | 1.8  | 2.1  | 1.9  | 2.0  | 1.9  |
| 42 | syringylacetone          | 19037582 | 29.13                | S, C <sub>β</sub> -O                    | C <sub>γ</sub>   | 210                                                   | 0.3     | 0.7  | 0.8  | 0.4  | 0.4  | 0.5  | 0.5  |
| 43 | propiosyringone          | 5650431  | 29.75                | S, C <sub>α</sub> -O                    | C <sub>γ</sub>   | 210                                                   | 0.0     | 0.1  | 0.1  | 0.1  | 0.1  | 0.0  | 0.1  |
| 44 | syringoyl acetaldehyde   | -        | 29.90                | S, C <sub>α</sub> -O, C <sub>γ</sub> -O | C <sub>γ</sub>   | 224                                                   | 0.2     | 3.4  | 4.0  | 1.0  | 0.9  | 1.1  | 1.4  |
| 45 | syringyl vinyl ketone    | -        | 30.03                | S, C <sub>α</sub> -O                    | C <sub>γ</sub>   | 208                                                   | 0.0     | 0.1  | 0.1  | 0.1  | 0.1  | 0.0  | 0.0  |
| 46 | dihydrosinapyl alcohol   | 20736258 | 30.22                | G, C <sub>γ</sub> -O                    | C <sub>γ</sub>   | 212                                                   | 0.0     | 0.0  | 0.0  | 0.0  | 0.0  | 0.0  | 0.0  |
| 47 | cis-sinapyl alcohol      | 537337   | 32.07                | S, C <sub>γ</sub> -O                    | C <sub>γ</sub>   | 210                                                   | 0.9     | 0.6  | 0.6  | 0.8  | 0.8  | 0.7  | 0.7  |
| 48 | trans-sinapyl alcohol    | 537337   | 33.79                | S, C <sub>γ</sub> -O                    | C <sub>γ</sub>   | 210                                                   | 16.6    | 9.3  | 10.0 | 13.6 | 13.7 | 11.6 | 11.9 |
| 49 | trans-sinapaldehyde      | 4206580  | 34.00                | S, C <sub>γ</sub> -O                    | C <sub>γ</sub>   | 208                                                   | 2.0     | 2.3  | 2.4  | 2.4  | 2.3  | 2.1  | 2.0  |
