# Supplementary material for: Mechanistic insight in the selective delignification of wheat straw by three white-rot fungal species through quantitative 13C-IS py-GC–MS and whole cell wall HSQC NMR
Source: PubMed Central journal article supplement (PMC6156916; doi:10.1186/s13068-018-1259-9), 2018-09-26
Supplement: 13068_2018_1259_MOESM3_ESM.pdf [file 13068_2018_1259_MOESM3_ESM.pdf]

**Table S-2 Lignin content and removal determined by semi-quantitative and quantitative  $^{13}\text{C}$ -IS py-GC-MS of control and fungal-treated wheat straw after 7 weeks of fungal growth *Cs* *Ceriporiopsis subvermispora*, *Pe* *Pleurotus eryngii*, *Le* *Lentinula edodes*. Average and standard deviation of analytical triplicates on pooled biological triplicates.**

|                                  | <b>Control</b> | <b>Cs1</b> | <b>Cs12</b> | <b>Pe3</b> | <b>Pe6</b> | <b>Le8</b> | <b>Le10</b> |
|----------------------------------|----------------|------------|-------------|------------|------------|------------|-------------|
| <b>Dry matter (g)</b>            | 90.2 ± 0.3     | 84.4 ± 0.4 | 89.4 ± 0.2  | 87.3 ± 0.1 | 88.0 ± 0.2 | 83.7 ± 1.4 | 84.6 ± 3.0  |
| <b>Lignin content (% w/w)</b>    |                |            |             |            |            |            |             |
| <b>semi-quant</b>                | 30.5 ± 1.4     | 8.6 ± 0.4  | 9.3 ± 0.8   | 16.2 ± 1.2 | 15.6 ± 0.2 | 10.9 ± 0.9 | 12.2 ± 0.2  |
| $^{13}\text{C}$ -IS <b>quant</b> | 23.2 ± 0.8     | 8.3 ± 0.3  | 9.3 ± 0.3   | 13.7 ± 0.7 | 15.6 ± 1.0 | 10.3 ± 0.4 | 10.5 ± 0.2  |
| <b>Lignin removal (% w/w)</b>    |                |            |             |            |            |            |             |
| <b>semi-quant</b>                | -              | 73.7 ± 5.0 | 69.7 ± 6.5  | 48.6 ± 4.2 | 50.1 ± 2.4 | 66.8 ± 6.4 | 62.6 ± 3.8  |
| $^{13}\text{C}$ -IS <b>quant</b> | -              | 66.4 ± 3.5 | 60.3 ± 3.0  | 43.0 ± 2.6 | 34.6 ± 2.6 | 58.8 ± 3.1 | 57.4 ± 3.2  |
