# Supplementary material for: Mechanistic insight in the selective delignification of wheat straw by three white-rot fungal species through quantitative 13C-IS py-GC–MS and whole cell wall HSQC NMR
Source: PubMed Central journal article supplement (PMC6156916; doi:10.1186/s13068-018-1259-9), 2018-09-26
Supplement: 13068_2018_1259_MOESM4_ESM.pdf [file 13068_2018_1259_MOESM4_ESM.pdf]

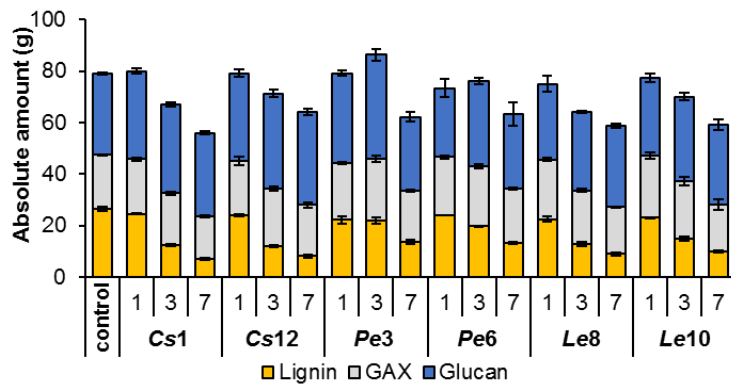

**Figure S-1 Residual lignin, glucuronoarabinoxylan (GAX) and glucan (cellulose) in fungal-treated wheat straw during growth (1, 3 and 7 weeks).** *Cs* *Ceriporiopsis subvermispora*, *Pe* *Pleurotus eryngii*, *Le* *Lentinula edodes*. Average and standard deviation of analytical triplicates on pooled biological triplicates.
