# Supplementary material for: Mechanistic insight in the selective delignification of wheat straw by three white-rot fungal species through quantitative 13C-IS py-GC–MS and whole cell wall HSQC NMR
Source: PubMed Central journal article supplement (PMC6156916; doi:10.1186/s13068-018-1259-9), 2018-09-26
Supplement: 13068_2018_1259_MOESM6_ESM.pdf [file 13068_2018_1259_MOESM6_ESM.pdf]

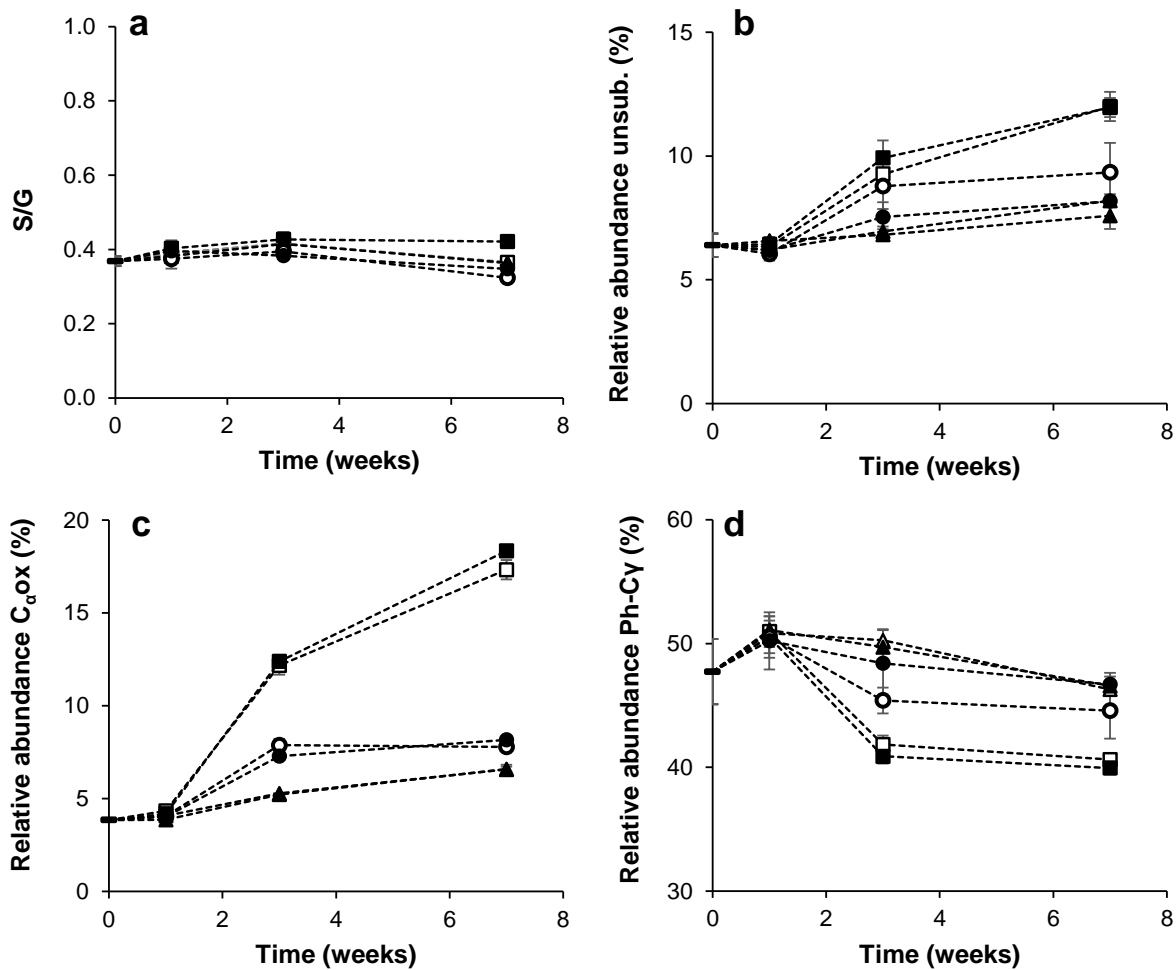

**Figure S-3 Structural changes of fungal-treated wheat straw lignin during fungal growth (1, 3 and 7 weeks) determined by semi-quantitative py-GC-MS.** *Cs* *Ceriporiopsis subvermispora*, *Pe* *Pleurotus eryngii*, *Le* *Lentinula edodes*. S/G ratio (a) and relative abundances of unsubstituted (b), C<sub>α</sub>-oxidized (c) and Ph-C<sub>γ</sub> (d) substructures are based on the structural classification shown in Additional file 2: Table S-1. □ *Cs*1, ■ *Cs*12, △ *Pe*3, ▲ *Pe*6, ○ *Le*8, ● *Le*10. Average and standard deviation of analytical triplicates on pooled biological triplicates.
