# Supplementary material for: Mechanistic insight in the selective delignification of wheat straw by three white-rot fungal species through quantitative 13C-IS py-GC–MS and whole cell wall HSQC NMR
Source: PubMed Central journal article supplement (PMC6156916; doi:10.1186/s13068-018-1259-9), 2018-09-26
Supplement: 13068_2018_1259_MOESM7_ESM.pdf [file 13068_2018_1259_MOESM7_ESM.pdf]

**Table S-3 Assignments of the lignin  $^{13}\text{C}$ - $^1\text{H}$  correlation peaks in the HSQC spectra of control and fungal-treated wheat straw. (t) tentative assignment.**

| label                            | $\delta_{\text{C}}/\delta_{\text{H}}$ (ppm) | Assignment <sup>a</sup>                                                                                         |
|----------------------------------|---------------------------------------------|-----------------------------------------------------------------------------------------------------------------|
| A $_{\alpha}$ (G)                | 70.9/4.70                                   | C $_{\alpha}$ -H $_{\alpha}$ in $\beta$ -O-4' substructures linked to G-unit                                    |
| A $_{\alpha}$ (S)                | 71.8/4.82                                   | C $_{\alpha}$ -H $_{\alpha}$ in $\beta$ -O-4' substructures linked to S-unit                                    |
| A $_{\beta}$ (G)                 | 83.5/4.25                                   | C $_{\beta}$ -H $_{\beta}$ in $\beta$ -O-4' substructures linked to G-unit                                      |
| A $_{\beta}$ (S)                 | 85.9/4.09                                   | C $_{\beta}$ -H $_{\beta}$ in $\beta$ -O-4' substructures linked to S-unit                                      |
| C $_{\alpha}$                    | 84.9/4.64                                   | C $_{\alpha}$ -H $_{\alpha}$ in resinol substructures                                                           |
| B $_{\alpha}$                    | 86.9/5.42                                   | C $_{\alpha}$ -H $_{\alpha}$ in phenylcoumaran substructures                                                    |
| T $_{8}$                         | 94.1/6.56                                   | C $_{8}$ -H $_{8}$ in triclin                                                                                   |
| T $_{6}$                         | 98.8/6.20                                   | C $_{6}$ -H $_{6}$ in triclin                                                                                   |
| Smod $_{2,6}$                    | 103.5/6.97                                  | C $_{2}$ -H $_{2}$ and C $_{6}$ -H $_{6}$ in S-unit derivative (t)                                              |
| S $_{2,6}$                       | 103.6/6.68                                  | C $_{2}$ -H $_{2}$ and C $_{6}$ -H $_{6}$ in S-unit                                                             |
| T $_{2'6'}$                      | 104.0/7.31                                  | C $_{2'}$ -H $_{2'}$ and C $_{6'}$ -H $_{6'}$ in triclin                                                        |
| T $_{3}$                         | 104.6/6.99                                  | C $_{3}$ -H $_{3}$ in triclin                                                                                   |
| Sox $_{2,6}$                     | 106.4/7.32                                  | C $_{2}$ -H $_{2}$ and C $_{6}$ -H $_{6}$ in C $_{\alpha}$ -oxidized (C $_{\alpha}$ =O) S-unit                  |
| Sox $_{2,6}$                     | 106.5/7.18                                  | C $_{2}$ -H $_{2}$ and C $_{6}$ -H $_{6}$ in C $_{\alpha}$ -oxidized (C $_{\alpha}$ OOH) S-unit                 |
| Sald $_{2,6}$                    | 106.3/7.03                                  | C $_{2}$ -H $_{2}$ and C $_{6}$ -H $_{6}$ in cinnamaldehyde end-group S-unit                                    |
| G $_{2}$                         | 110.5/6.94                                  | C $_{2}$ -H $_{2}$ in G-unit                                                                                    |
| FA $_{2}$                        | 110.9/7.32                                  | C $_{2}$ -H $_{2}$ in ferulate                                                                                  |
| GoxI $_{2}$                      | 111.4/7.53                                  | C $_{2}$ -H $_{2}$ in C $_{\alpha}$ -oxidized G-unit                                                            |
| GoxII $_{2}$                     | 112.4/7.42                                  | C $_{2}$ -H $_{2}$ in C $_{\alpha}$ -oxidized G-unit (t)                                                        |
| Gmod $_{2}$                      | 112.7/6.76                                  | C $_{2}$ -H $_{2}$ in G-unit derivative (t)                                                                     |
| FA $_{\beta}$ /pCA $_{\beta}$    | 113.9/6.51                                  | C $_{\beta}$ -H $_{\beta}$ in ferulate/ <i>p</i> -coumarate                                                     |
| H $_{3,5}$ /FA $_{5}$            | 114.5/6.69                                  | C $_{3}$ -H $_{3}$ and C $_{5}$ -H $_{5}$ in H-unit, C $_{5}$ -H $_{5}$ in FA                                   |
| G $_{5}$ /G $_{6}$ /pCA $_{3,5}$ | 115.1/6.94 and 115.3/6.72                   | C $_{5}$ -H $_{5}$ and C $_{6}$ -H $_{6}$ in G-unit, C $_{3}$ -H $_{3}$ and C $_{5}$ -H $_{5}$ of pCA           |
| G $_{5}$                         | 118.9/6.77                                  | C $_{5}$ -H $_{5}$ in G-unit                                                                                    |
| GoxI $_{6}$                      | 122.8/7.49                                  | C $_{6}$ -H $_{6}$ in C $_{\alpha}$ -oxidized G-unit                                                            |
| FA $_{6}$                        | 123.1/7.12                                  | C $_{6}$ -H $_{6}$ in ferulate                                                                                  |
| GoxII $_{6}$                     | 125.8/7.40                                  | C $_{2}$ -H $_{2}$ in C $_{\alpha}$ -oxidized G-unit (t)                                                        |
| H $_{2,6}$ /PHE $_{3,5}$         | 127.7/7.17                                  | C $_{2}$ -H $_{2}$ and C $_{6}$ -H $_{6}$ in H-unit, C $_{3}$ -H $_{3}$ and C $_{5}$ -H $_{5}$ in phenylalanine |
| PHE $_{2,6}$                     | 129.0/7.20                                  | C $_{2}$ -H $_{2}$ and C $_{6}$ -H $_{6}$ in phenylalanine                                                      |
| pCA $_{2,6}$                     | 130.1/7.48                                  | C $_{2}$ -H $_{2}$ and C $_{6}$ -H $_{6}$ in <i>p</i> -coumarate                                                |
| FA $_{\alpha}$ /pCA $_{\alpha}$  | 145.0/7.56                                  | C $_{\alpha}$ -H $_{\alpha}$ in ferulate/ <i>p</i> -coumarate                                                   |

<sup>a</sup>: assignment by comparison with literature (1-9).

## References

1. Del Río JC, Rencoret J, Prinsen P, Martínez AT, Ralph J, Gutiérrez A. Structural characterization of wheat straw lignin as revealed by analytical pyrolysis, 2D-NMR, and reductive cleavage methods. *J Agric Food Chem.* 2012;60:5922-35.
2. Yuan T-Q, Sun S-N, Xu F, Sun R-C. Characterization of lignin structures and lignin-carbohydrate complex (LCC) linkages by quantitative  $^{13}\text{C}$  and 2D HSQC NMR spectroscopy. *J Agric Food Chem.* 2011;59:10604-14.
3. Ralph SA, Ralph J, Landucci L. NMR database of lignin and cell wall model compounds. 2009; Available at URL [www.qlbrc.org/databases\\_and\\_software/nmrdatabase/](http://www.qlbrc.org/databases_and_software/nmrdatabase/).
4. Rencoret J, Gutiérrez A, Nieto L, Jiménez-Barbero J, Faulds CB, Kim H, et al. Lignin composition and structure in young versus adult *Eucalyptus globulus* plants. *Plant Physiol.* 2011;155:pp. 110.167254.
5. Rencoret J, Pereira A, del Río JC, Martínez AT, Gutiérrez A. Delignification and saccharification enhancement of sugarcane byproducts by a laccase-based pretreatment. *ACS Sustainable Chem Eng.* 2017;5:7145-54.
6. Del Río JC, Lino AG, Colodette JL, Lima CF, Gutiérrez A, Martínez AT, et al. Differences in the chemical structure of the lignins from sugarcane bagasse and straw. *Biomass Bioenergy.* 2015;81:322-38.
7. Villaverde JJ, Li J, Ek M, Ligeró P, de Vega A. Native lignin structure of *Miscanthus x giganteus* and its changes during acetic and formic acid fractionation. *J Agric Food Chem.* 2009;57:6262-70.
8. Das A, Rahimi A, Ulbrich A, Alherech M, Motagamwala AH, Bhalla A, et al. Lignin conversion to low-molecular-weight aromatics via an aerobic oxidation-hydrolysis sequence: comparison of different lignin sources. *ACS Sustainable Chem Eng.* 2018;6:3367-74.
9. Kim H, Padmakshan D, Li Y, Rencoret J, Hatfield RD, Ralph J. Characterization and elimination of undesirable protein residues in plant cell wall materials for enhancing lignin analysis by solution-state nuclear magnetic resonance spectroscopy. *Biomacromolecules.* 2017;18(12):4184-95.
